# Supplementary material for: Construction of a micro/nano structured surface on a β-TCP/CaSiO3 bioceramic promotes osteogenic differentiation of mBMSCs
Source: Royal Society of Chemistry journal article supplement (doi:10.1039/c8ce01711e), 2018-11-10
Supplement: c8ce01711e1.pdf [file c8ce01711e1.pdf]

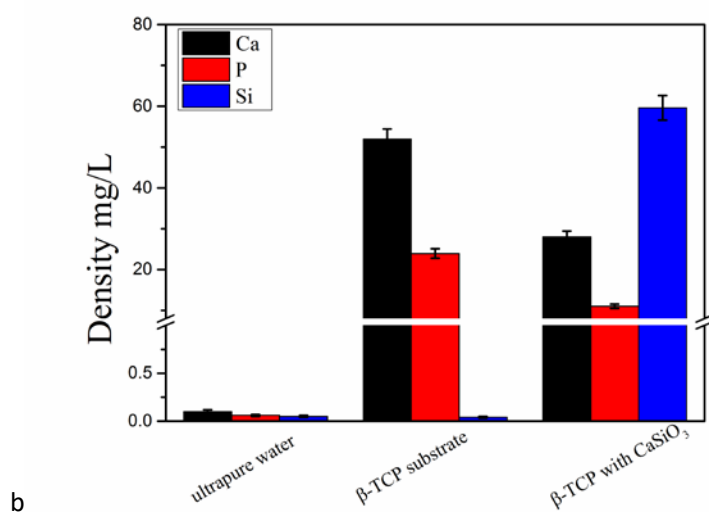

Figure 1. ICP results of the reacted reagents. Detected elements included calcium, phosphate and silicon.

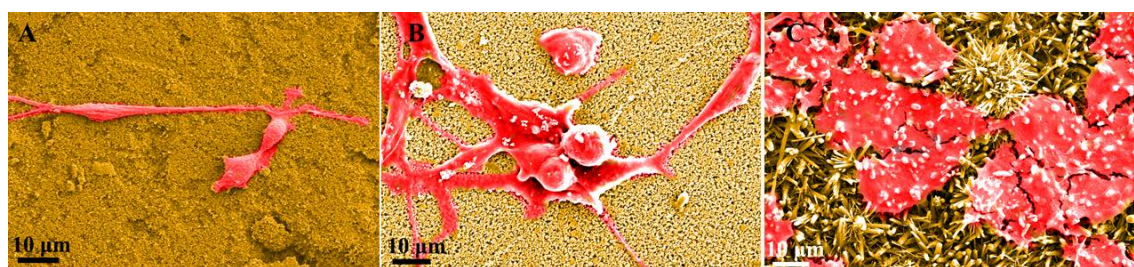

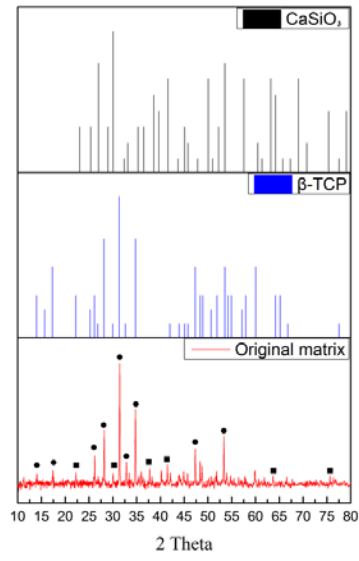

Figure 3. XRD of original matrix. Squares corresponded to  $\text{CaSiO}_3$  characteristic peak and circles corresponded to  $\beta\text{-TCP}$ . Wollastonite JCPDS code 00-002-0689, whitlockite 00-003-0713

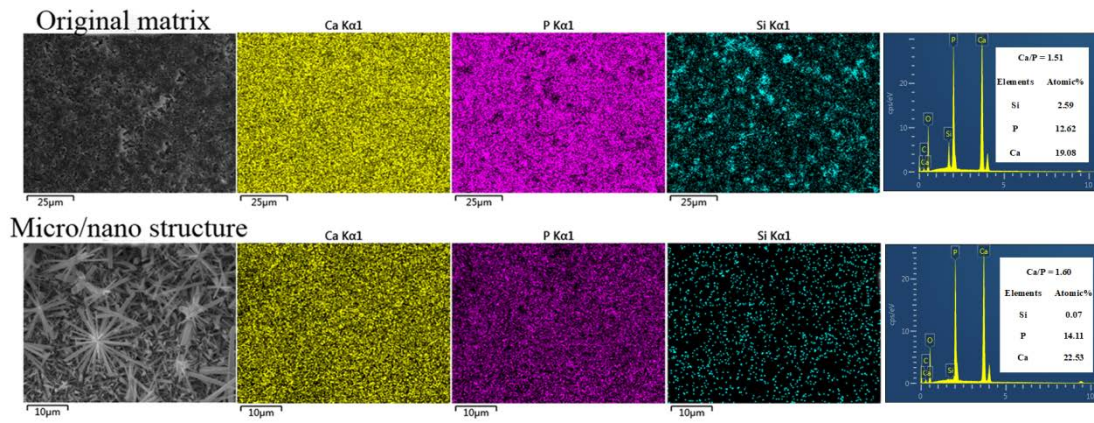

Figure 4. EDS of the original matrix and micro/nano structured surface.
